# Supplementary material for: Herpes Simplex Virus type-1 infection induces synaptic dysfunction in cultured cortical neurons via GSK-3 activation and intraneuronal amyloid-β protein accumulation
Source: PubMed Central journal article supplement (PMC4614347; doi:10.1038/srep15444), 2015-10-21

# Herpes Simplex Virus type-1 infection induces synaptic dysfunction in cultured cortical neurons via GSK-3 activation and intraneuronal amyloid- $\beta$ protein accumulation

Roberto Piacentini<sup>1#</sup>, Domenica Donatella Li Puma<sup>1#</sup>, Cristian Ripoli<sup>1</sup>, Maria Elena Marcocci<sup>2</sup>, Giovanna De Chiara<sup>3</sup>, Enrico Garaci<sup>4</sup>, Anna Teresa Palamara<sup>4,5</sup>, Claudio Grassi<sup>1,4\*</sup>

<sup>1</sup> Institute of Human Physiology, Medical School, Università Cattolica, 00168 Rome, Italy

<sup>2</sup> Department of Public Health and Infectious Diseases, Sapienza University of Rome, 00185 Rome, Italy

<sup>3</sup> Institute of Translational Pharmacology, National Research Council, 00133 Rome, Italy

<sup>4</sup> San Raffaele Pisana Scientific Institute for Research, Hospitalization and Health Care, 00163 Rome, Italy

<sup>5</sup> Department of Public Health and Infectious Diseases, Institute Pasteur Cenci Bolognetti Foundation, Sapienza University of Rome, 00185 Rome, Italy

**#R.P. and D.D.L. contributed equally to this work.**

\*Corresponding Author: Claudio Grassi, Institute of Human Physiology, Università Cattolica, Largo Francesco Vito 1, 00168 Rome, Italy. E-mail: grassi@rm.unicatt.it. Phone: +39-06-3015-4966; Fax: +39-06-3015-4665

## Figure legends

### Suppl. Figure 1: HSV-1 induces phosphorylation of GSK-3 at Ser9/21.

**(a-b)** Representative examples of mock- and HSV-1-infected neurons at 18 h p.i. immunostained for pGSK<sup>S9/21</sup> (green) and MAP2 (red). **(c)** Bar graphs showing mean fluorescence intensities of GSK phosphorylation at Ser9/21 in the conditions represented in a-b. **(d)** Western blot analysis of pGSK-3<sup>S9/21</sup>, total GSK-3 $\alpha/\beta$  and GAPDH carried out on lysates of mock- (left lane) and HSV-1-infected (right lane) cells at 18 h p.i.. **(e)** Densitometric analysis of three independent Western blot experiments. Scale bars: 20  $\mu$ m. \*P<0.05 \*\*P<0.001 vs. mock.

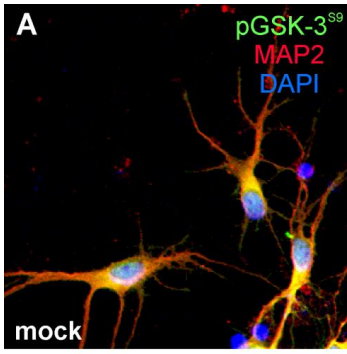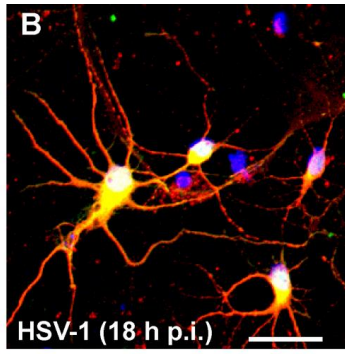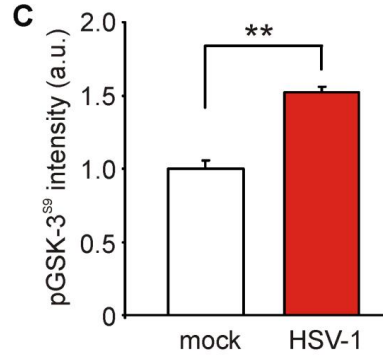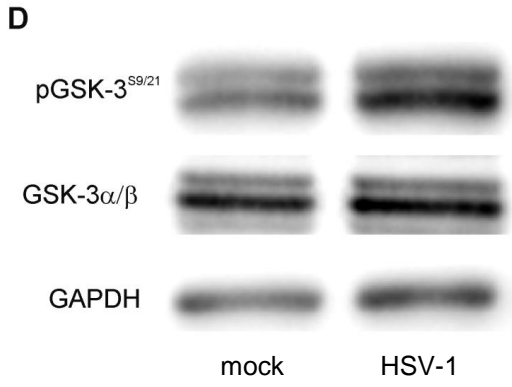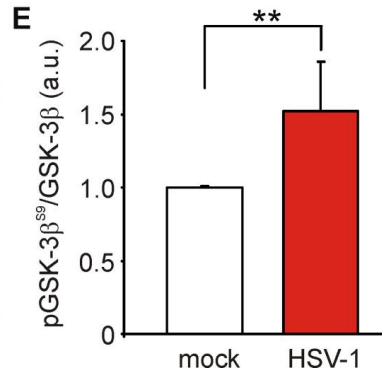

Supplement: srep15444-s1.pdf [file srep15444-s1.pdf]
